# Supplementary material
Source: HighWire-hosted journal article supplement (https://bmjopengastro.bmj.com/highwire/filestream/1997/field_highwire_adjunct_files/0/bmjgast-2020-000544supp001_data_supplement.pdf)
Supplement: bmjgast-2020-000544supp001_data_supplement.pdf [file bmjgast-2020-000544supp001_data_supplement.pdf]

Date: \_\_\_\_/\_\_\_\_/\_\_\_\_

Hospital: \_\_\_\_\_

Staff Grade: \_\_\_\_\_

Special Interest: \_\_\_\_\_

**Rank the following:**

Which is the most prevalent pathology:

Crohn's disease

Ulcerative Colitis

Coeliac Disease

Which is the most difficult/complicated condition to manage:

Crohn's disease

Ulcerative Colitis

Coeliac Disease

Which pathology has the greatest impact on patient quality of life:

Crohn's disease

Ulcerative Colitis

Coeliac Disease

Which is the most significant health problem:

Crohn's disease

Ulcerative Colitis

Coeliac Disease

**Answer the following questions stating 1) what you think other health care professionals believe, 2) what you personally believe with regards to coeliac disease**

| Belief                                                               | Clinicians | Personal |
|----------------------------------------------------------------------|------------|----------|
| Coeliac disease doesn't significantly impact patients daily life     |            |          |
| Coeliac disease requires the input of doctors for adequate treatment |            |          |
| Would prefer to be able to give a prescribed or surgical treatment   |            |          |
| The intervention of a gluten free diet is worthwhile for patients    |            |          |
| Coeliac disease is not academically challenging                      |            |          |

Would you have a greater interest in coeliac disease if there was more economic benefits?  
i.e. more funded conferences / more research grants Y / N

Rate your knowledge of the management of patients with coeliac disease persisting symptoms on gluten free diet from 1-10 \_\_\_\_\_

Additional comments from the questionnaire:
